# Supplementary material
Source: HighWire-hosted journal article supplement (https://www.life-science-alliance.org/content/1/6/e201800062/F11)

Full unedited gel for Figure 2 E

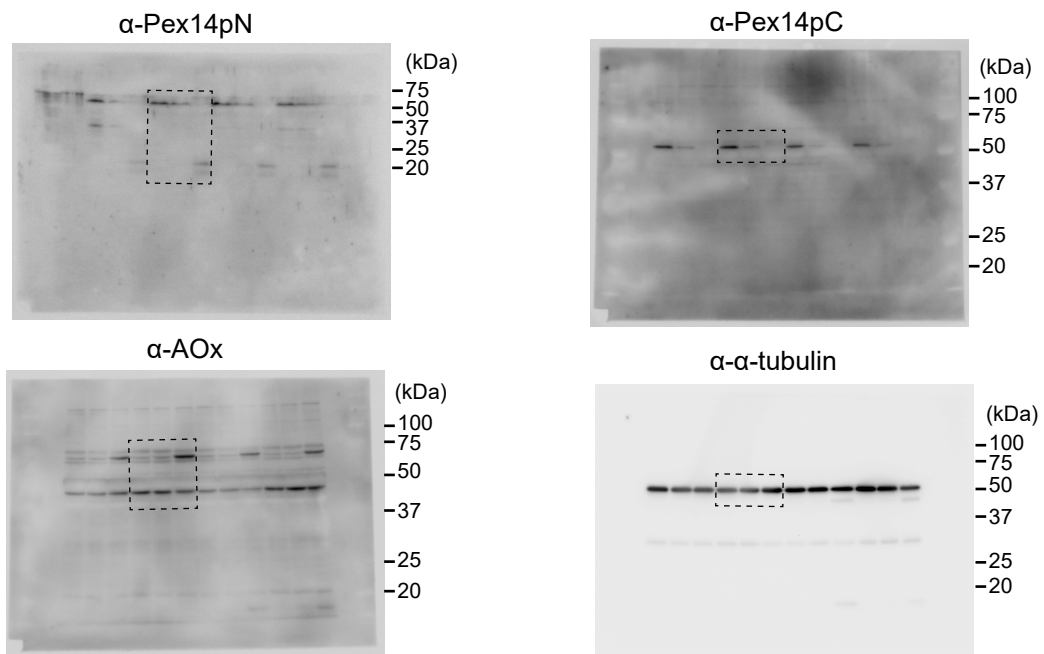

Full unedited gels for Figure 4 E

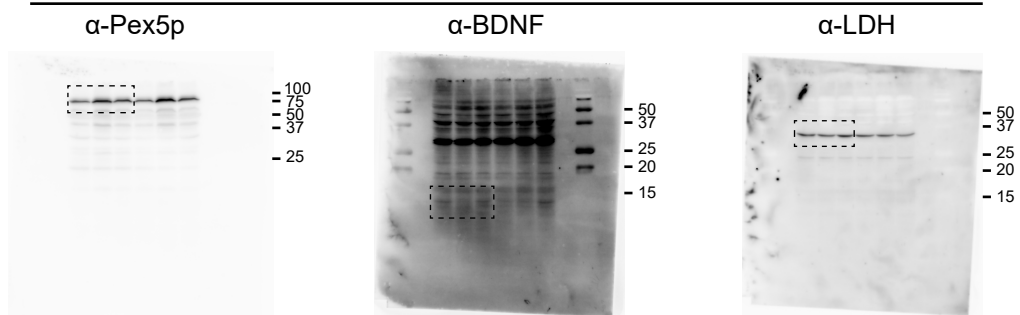

Full unedited gel for Figure 6 E

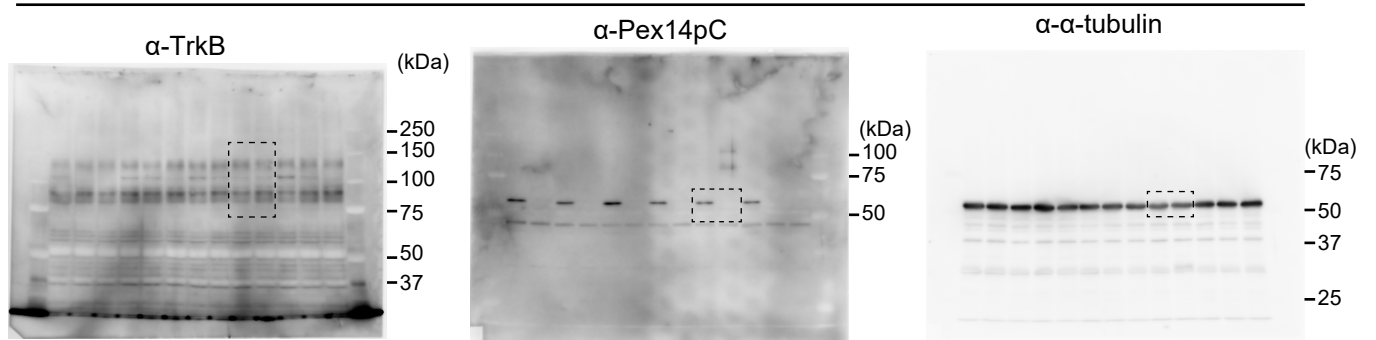

Full unedited gel for Figure 7 A

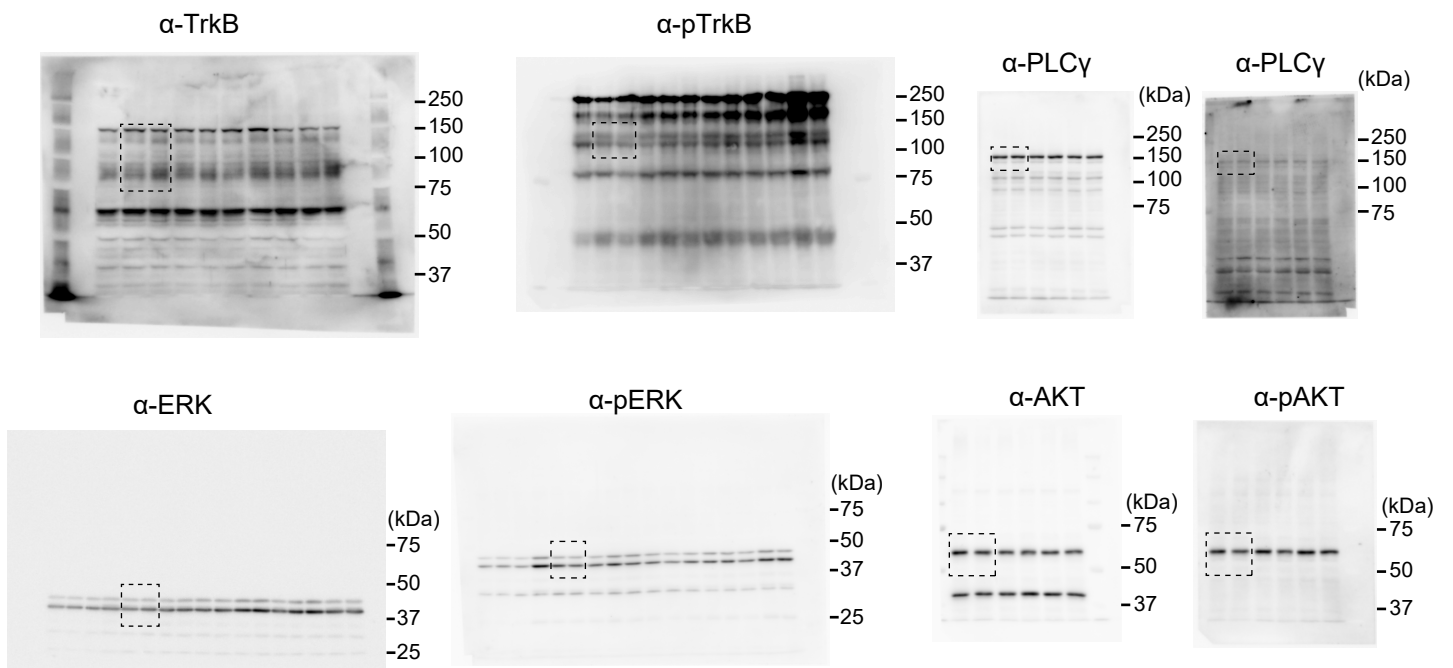

Full unedited gel for Figure 8 H

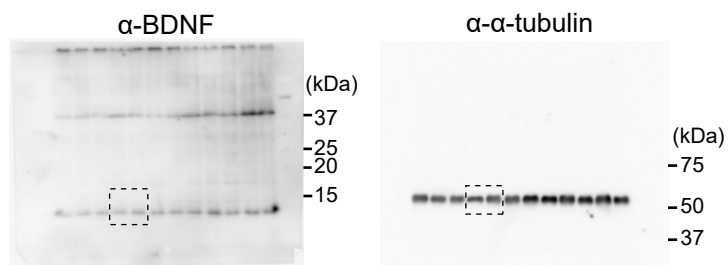

Full unedited gels for Figure S1 A

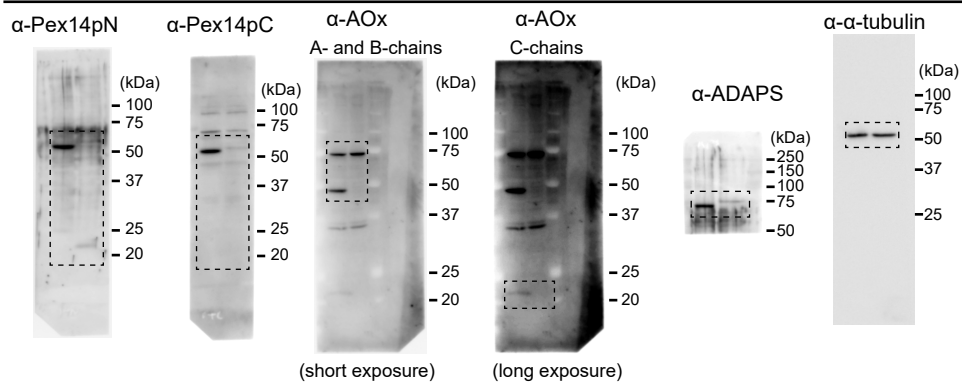

Full unedited gel for Figure S3 F

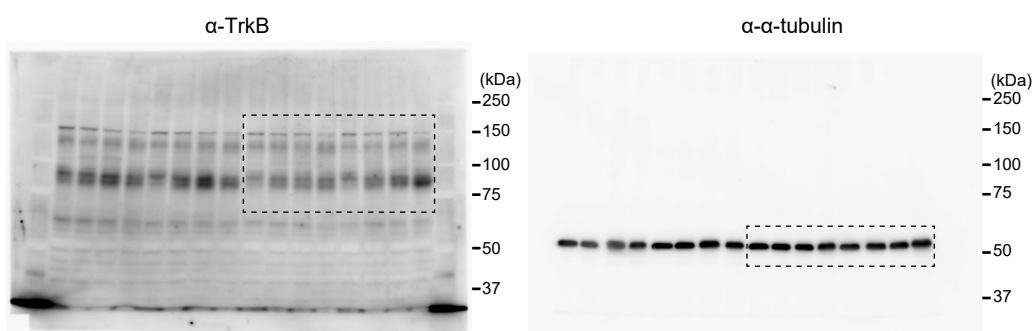

Full unedited gel for Figure S3 H

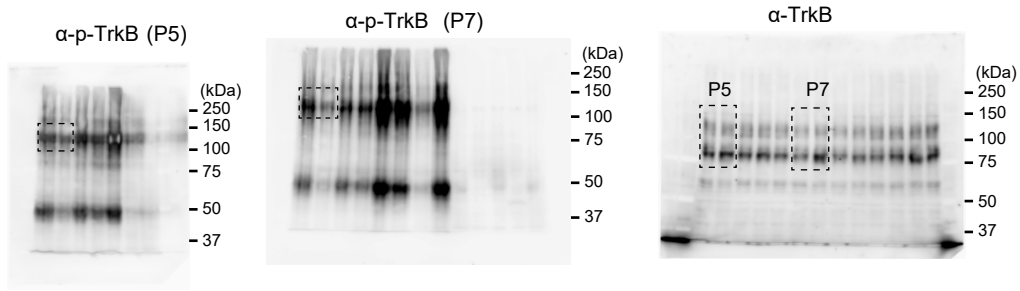

Full unedited gel for Figure S3 I

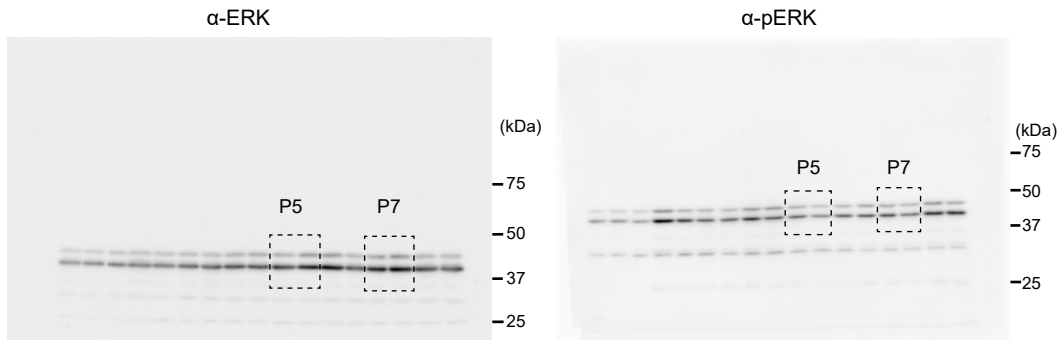

Full unedited gel for Figure S4 A

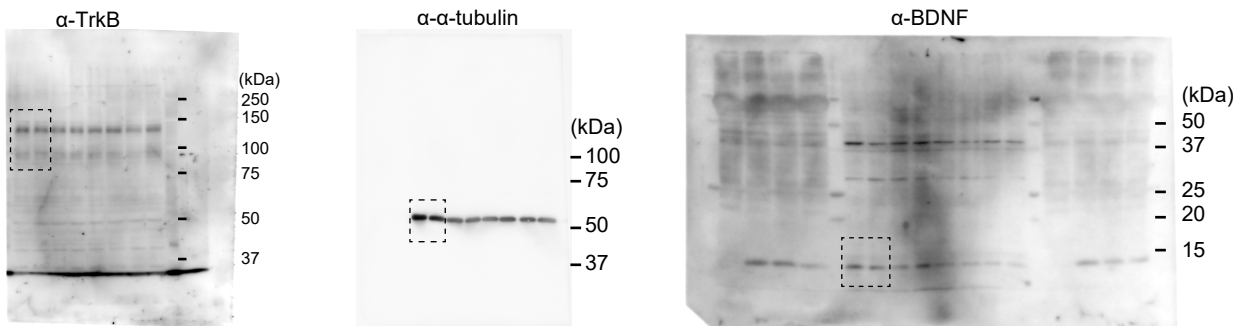

Full unedited gel for Figure S4 D

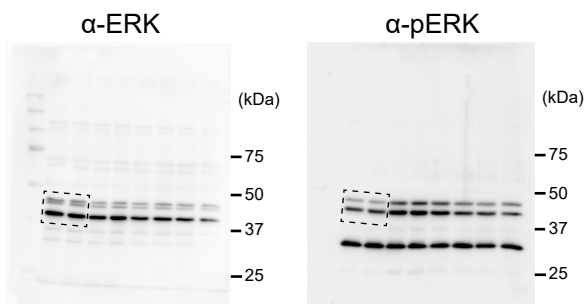

Full unedited gel for Figure S4 E

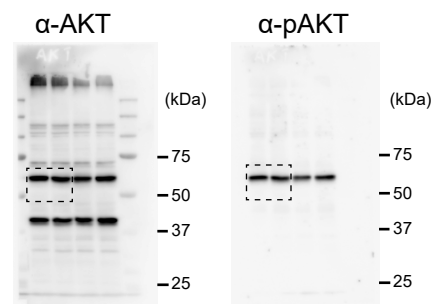

Supplement: inline-supplementary-material-7 [file inline-supplementary-material-7.pdf]
